# Supplementary material for: Effects of Task Complexity on Linguistic Complexity for Sustainable EFL Writing Skills Development
Source: MDPI journal article supplement (doi:10.3390/su14084791), 2022-04-16
Supplement: s1 [file s1]

Archive with 2 entries (2 files):
- Supplimentary Material S1.pdf
- Supplimentary Material S2.pdf
