# Supplementary material for: Effects of Task Complexity on Linguistic Complexity for Sustainable EFL Writing Skills Development
Source: MDPI journal article supplement (doi:10.3390/su14084791), 2022-04-16
Supplement: s1 [file s1]

## Supplementary Materials S1

### Four Writing Tasks Used in the Study

#### Task 1 (fewer elements, more prior knowledge)

Suppose you are looking for your life partner. Which of the following two candidates would **YOU** prefer? Why would you choose this candidate and not the other one? Please justify your preference with detailed reasons.

**Candidate A** is talented but a little lazy.

**Candidate B** is not so talented but hard-working.

*For this part, you have 40 minutes and should write at least 250 words<sup>1</sup>.*

#### Task 2 (fewer elements, less prior knowledge)

Suppose you are looking for your life partner. Which of the following two candidates would **YOUR MUM OR DAD** recommend to you? Why would s/he choose this candidate and not the other one? Please justify her/his possible preference with detailed reasons.

**Candidate A** is talented but a little lazy.

**Candidate B** is not so talented but hard-working.

*For this part, you have 40 minutes and should write at least 250 words.*

#### Task 3 (more elements, more prior knowledge)

Suppose you are looking for your life partner. Which of the following three candidates would **YOU** choose? Why would you choose this candidate and not the others? Please justify your preference with detailed reasons.

**Candidate A** is talented, hard-working, but not so sociable and comes from a relatively poor family background.

**Candidate B** is not so talented, but is hard-working and very sociable though s/he comes from a relatively poor family background.

---

<sup>1</sup> 25 words is the requirement for English majors. Non-English majors should write at least 150 words, since this is what they usually do in their daily practice.

**Candidate C** is not so talented and a little lazy. S/he is, however, very sociable and comes from a very well-to-do family background.

*For this part, you have 40 minutes and should write at least 250 words.*

**Task 4 (more elements, less prior knowledge)**

Suppose you are looking for your life partner. Which of the following three candidates would **YOUR MUM OR DAD** recommend to you? Why would s/he choose this candidate and not the others? Please justify her/his possible preference with detailed reasons.

**Candidate A** is talented, hard-working, but not so sociable and comes from a relatively poor family background.

**Candidate B** is not so talented, but is hard-working and very sociable though s/he comes from a relatively poor family background.

**Candidate C** is not so talented and a little lazy. S/he is, however, very sociable and comes from a very well-to-do family background.

*For this part, you have 40 minutes and should write at least 250 words.*
