# Supplementary material for: Effects of Task Complexity on Linguistic Complexity for Sustainable EFL Writing Skills Development
Source: MDPI journal article supplement (doi:10.3390/su14084791), 2022-04-16
Supplement: s1 [file s1 › Supplimentary Material S2.pdf]

## Supplementary Materials S2

**Descriptive Statistics for Linguistic Complexity Measures Across Writing Tasks**

| Linguistic complexity | Measures                  |                                      | Task 1  |        | Task 2  |        | Task 3  |        | Task 4  |        |
|-----------------------|---------------------------|--------------------------------------|---------|--------|---------|--------|---------|--------|---------|--------|
|                       | Type                      | Code                                 | M       | SD     | M       | SD     | M       | SD     | M       | SD     |
| Syntactic complexity  | Length of production unit | Mean length of clause (MLC)          | 7.348   | 0.857  | 7.354   | 1.118  | 7.399   | 0.975  | 7.631   | 1.013  |
|                       |                           | Mean length of sentence (MLS)        | 15.196  | 3.125  | 15.508  | 3.861  | 16.045  | 3.704  | 16.731  | 4.036  |
|                       |                           | Mean length of T-unit (MLT)          | 13.798  | 2.687  | 13.741  | 2.969  | 14.010  | 2.812  | 14.546  | 2.753  |
|                       | Subordination             | T-unit complexity ratio (C/T)        | 1.887   | 0.365  | 1.874   | 0.334  | 1.906   | 0.363  | 1.920   | 0.370  |
|                       |                           | Complex T-unit ratio (CT/T)          | 0.551   | 0.143  | 0.555   | 0.133  | 0.561   | 0.167  | 0.550   | 0.161  |
|                       |                           | Dependent clause ratio (DC/C)        | 0.416   | 0.083  | 0.418   | 0.077  | 0.424   | 0.099  | 0.416   | 0.092  |
|                       |                           | Dependent clauses per T-unit (DC/T)  | 0.807   | 0.329  | 0.802   | 0.267  | 0.839   | 0.330  | 0.825   | 0.330  |
|                       | Coordination              | Coordinate phrases per T-unit (CP/T) | 0.274   | 0.151  | 0.259   | 0.155  | 0.287   | 0.172  | 0.293   | 0.179  |
|                       |                           | Coordinate phrases per clause (CP/C) | 0.149   | 0.085  | 0.138   | 0.081  | 0.152   | 0.085  | 0.154   | 0.093  |
|                       |                           | Sentence coordination ratio (T/S)    | 1.104   | 0.119  | 1.129   | 0.140  | 1.149   | 0.175  | 1.150   | 0.176  |
|                       | Particular structures     | Complex nominals per clause (CN/C)   | 0.710   | 0.177  | 0.733   | 0.198  | 0.713   | 0.169  | 0.716   | 0.187  |
|                       |                           | Complex nominals per T-unit (CN/T)   | 1.407   | 0.418  | 1.458   | 0.441  | 1.301   | 0.449  | 1.281   | 0.421  |
|                       |                           | Verb phrases per T-unit (VP/T)       | 2.306   | 0.465  | 2.259   | 0.419  | 2.325   | 0.433  | 2.324   | 0.463  |
|                       | Sentence complexity       | Sentence complexity ratio (C/S)      | 2.077   | 0.410  | 2.116   | 0.475  | 2.186   | 0.513  | 2.204   | 0.514  |
| Lexical complexity    | Lexical density           | Lexical Density (LD)                 | 0.499   | 0.032  | 0.492   | 0.031  | 0.502   | 0.031  | 0.503   | 0.026  |
|                       | Lexical sophistication    | Lexical Sophistication1 (LS1)        | 0.284   | 0.056  | 0.259   | 0.063  | 0.262   | 0.055  | 0.248   | 0.053  |
|                       |                           | Lexical Sophistication2 (LS2)        | 0.173   | 0.034  | 0.174   | 0.036  | 0.176   | 0.031  | 0.172   | 0.378  |
|                       |                           | Verb Sophistication 1 (VS1)          | 0.116   | 0.066  | 0.102   | 0.060  | 0.113   | 0.063  | 0.119   | 0.061  |
|                       |                           | Corrected VS1 (CVS1)                 | 0.431   | 0.243  | 0.361   | 0.214  | 0.414   | 0.224  | 0.425   | 0.221  |
|                       |                           | Verb Sophistication 2 (VS2)          | 0.489   | 0.470  | 0.350   | 0.368  | 0.442   | 0.391  | 0.459   | 0.421  |
|                       | Lexical variation         | Number of Different Words (NDW)      | 112.677 | 24.454 | 106.388 | 24.520 | 116.860 | 26.556 | 111.318 | 23.399 |
|                       |                           | NDW (first 50 words) (NDW-50)        | 33.409  | 3.398  | 35.047  | 3.327  | 35.452  | 3.484  | 35.529  | 3.594  |
|                       |                           | NDW (expected random 50) (NDWER50)   | 37.007  | 1.982  | 36.991  | 2.049  | 37.372  | 1.760  | 37.091  | 1.973  |
|                       |                           | NDW(expected sequence 50) (NDWES50)  | 36.944  | 2.184  | 37.046  | 2.079  | 37.301  | 2.071  | 37.271  | 1.989  |
|                       |                           | Type-Token Ratio (TTR)               | 0.457   | 0.057  | 0.469   | 0.056  | 0.463   | 0.057  | 0.454   | 0.060  |
|                       |                           | Mean Segmental TTR (50) (MSTTR-50)   | 0.728   | 0.041  | 0.732   | 0.044  | 0.745   | 0.041  | 0.740   | 0.039  |
|                       |                           | Corrected TTR (CTTR)                 | 5.030   | 0.581  | 4.945   | 0.597  | 5.143   | 0.578  | 4.984   | 0.574  |
|                       |                           | Root TTR (RTTR)                      | 7.113   | 0.822  | 6.993   | 0.844  | 7.274   | 0.817  | 7.049   | 0.812  |

|  |  |                             |        |       |        |       |        |       |        |       |
|--|--|-----------------------------|--------|-------|--------|-------|--------|-------|--------|-------|
|  |  | Bilogarithmic TTR (LogTTR)  | 0.857  | 0.020 | 0.858  | 0.019 | 0.859  | 0.019 | 0.855  | 0.021 |
|  |  | Uber Index (UBER)           | 16.871 | 2.093 | 16.908 | 2.346 | 17.245 | 2.058 | 16.740 | 2.293 |
|  |  | Lexical Word Variation (LV) | 0.723  | 0.108 | 0.728  | 0.101 | 0.712  | 0.101 | 0.705  | 0.111 |
|  |  | Verb Variation-I (VV1)      | 14.989 | 5.704 | 13.465 | 4.734 | 14.122 | 5.143 | 12.829 | 4.744 |
|  |  | Squared VV1 (SVV1)          | 2.688  | 0.523 | 2.552  | 0.468 | 2.614  | 0.484 | 2.491  | 0.465 |
|  |  | Corrected VV1 (CVV1)        | 0.609  | 0.075 | 0.620  | 0.081 | 0.616  | 0.075 | 0.603  | 0.081 |
|  |  | Verb Variation-II (VV2)     | 0.160  | 0.033 | 0.164  | 0.035 | 0.154  | 0.031 | 0.144  | 0.030 |
|  |  | Noun Variation (NV)         | 0.556  | 0.088 | 0.561  | 0.093 | 0.570  | 0.098 | 0.530  | 0.088 |
|  |  | Adjective Variation (AdjV)  | 0.129  | 0.028 | 0.131  | 0.029 | 0.137  | 0.028 | 0.132  | 0.033 |
|  |  | Adverb Variation (AdvV)     | 0.092  | 0.024 | 0.089  | 0.024 | 0.096  | 0.027 | 0.092  | 0.026 |
|  |  | Modifier Variation (ModV)   | 0.222  | 0.037 | 0.220  | 0.037 | 0.233  | 0.040 | 0.225  | 0.043 |

**The main and interactive effects of number of elements and prior knowledge on linguistic complexity**

| Linguistic complexity | Measures                  |         | Number of elements |    |        | Prior knowledge |    |        | Number of elements * Prior knowledge |    |        |
|-----------------------|---------------------------|---------|--------------------|----|--------|-----------------|----|--------|--------------------------------------|----|--------|
|                       | Type                      | Code    | F                  | df | p      | F               | df | p      | F                                    | df | p      |
| Syntactic complexity  | Length of production unit | MLC     | 3.230              | 1  | 0.074  | 1.031           | 1  | 0.311  | 1.520                                | 1  | 0.219  |
|                       |                           | MLS     | 8.518              | 1  | 0.004* | 1.384           | 1  | 0.241  | 0.277                                | 1  | 0.599  |
|                       |                           | MLT     | 3.382              | 1  | 0.068  | 0.569           | 1  | 0.452  | 1.150                                | 1  | 0.285  |
|                       | Subordination             | C/T     | 0.873              | 1  | 0.351  | 0.000           | 1  | 0.989  | 0.141                                | 1  | 0.707  |
|                       |                           | CT/T    | 0.023              | 1  | 0.880  | 0.043           | 1  | 0.836  | 0.270                                | 1  | 0.604  |
|                       |                           | DC/C    | 0.147              | 1  | 0.702  | 0.063           | 1  | 0.802  | 0.387                                | 1  | 0.535  |
|                       |                           | DC/T    | 0.796              | 1  | 0.373  | 0.073           | 1  | 0.787  | 0.019                                | 1  | 0.891  |
|                       | Coordination              | CP/T    | 2.125              | 1  | 0.147  | 0.067           | 1  | 0.796  | 0.426                                | 1  | 0.515  |
|                       |                           | CP/C    | 1.295              | 1  | 0.257  | 0.193           | 1  | 0.661  | 0.570                                | 1  | 0.451  |
|                       |                           | T/S     | 4.399              | 1  | 0.037* | 0.531           | 1  | 0.467  | 0.606                                | 1  | 0.437  |
|                       | Particular structures     | CN/C    | 0.137              | 1  | 0.711  | 0.383           | 1  | 0.537  | 0.321                                | 1  | 0.571  |
|                       |                           | CN/T    | 10.186             | 1  | 0.002* | 0.105           | 1  | 0.746  | 0.643                                | 1  | 0.424  |
|                       |                           | VP/T    | 0.970              | 1  | 0.326  | 0.217           | 1  | 0.642  | 0.293                                | 1  | 0.589  |
| Lexical complexity    | Sentence complexity       | C/S     | 4.739              | 1  | 0.031* | 0.266           | 1  | 0.607  | 0.053                                | 1  | 0.818  |
|                       | Lexical density           | LD      | 5.617              | 1  | 0.019* | 0.858           | 1  | 0.355  | 1.734                                | 1  | 0.190  |
|                       | Lexical sophistication    | LS1     | 7.724              | 1  | 0.006* | 10.754          | 1  | 0.001* | 0.792                                | 1  | 0.375  |
|                       |                           | LS2     | 0.016              | 1  | 0.900  | 0.168           | 1  | 0.683  | 0.585                                | 1  | 0.445  |
|                       |                           | VS1     | 1.249              | 1  | 0.265  | 0.273           | 1  | 0.602  | 2.831                                | 1  | 0.094  |
|                       |                           | CVS1    | 1.194              | 1  | 0.276  | 1.252           | 1  | 0.265  | 3.614                                | 1  | 0.059  |
|                       |                           | VS2     | 0.581              | 1  | 0.447  | 1.649           | 1  | 0.201  | 3.800                                | 1  | 0.053  |
|                       | Lexical variation         | NDW     | 6.074              | 1  | 0.015* | 3.357           | 1  | 0.069  | 0.041                                | 1  | 0.840  |
|                       |                           | NDW-50  | 13.461             | 1  | 0.000* | 4.913           | 1  | 0.028* | 5.141                                | 1  | 0.025* |
|                       |                           | NDWER50 | 1.591              | 1  | 0.209  | 0.435           | 1  | 0.510  | 0.518                                | 1  | 0.473  |
|                       |                           | NDWES50 | 2.130              | 1  | 0.146  | 0.022           | 1  | 0.883  | 0.110                                | 1  | 0.740  |
|                       |                           | TTR     | 1.090              | 1  | 0.298  | 0.045           | 1  | 0.833  | 5.050                                | 1  | 0.026* |
|                       |                           | CTTR    | 2.540              | 1  | 0.113  | 2.779           | 1  | 0.097  | 0.602                                | 1  | 0.439  |

|  |  |          |        |   |        |       |   |        |       |   |        |
|--|--|----------|--------|---|--------|-------|---|--------|-------|---|--------|
|  |  | RTTR     | 2.535  | 1 | 0.113  | 2.794 | 1 | 0.096  | 0.559 | 1 | 0.440  |
|  |  | MSTTR-50 | 9.436  | 1 | 0.002* | 0.059 | 1 | 0.809  | 1.197 | 1 | 0.275  |
|  |  | LOGTTR   | 0.034  | 1 | 0.854  | 0.236 | 1 | 0.628  | 3.318 | 1 | 0.070  |
|  |  | UBER     | 0.327  | 1 | 0.568  | 0.719 | 1 | 0.398  | 2.246 | 1 | 0.136  |
|  |  | LV       | 0.786  | 1 | 0.706  | 0.745 | 1 | 0.389  | 0.189 | 1 | 0.665  |
|  |  | VV1      | 3.197  | 1 | 0.075  | 4.817 | 1 | 0.029* | 0.076 | 1 | 0.783  |
|  |  | SVV1     | 2.881  | 1 | 0.091  | 4.487 | 1 | 0.036* | 0.026 | 1 | 0.871  |
|  |  | CVV1     | 0.517  | 1 | 0.473  | 0.008 | 1 | 0.928  | 3.725 | 1 | 0.055  |
|  |  | VV2      | 19.440 | 1 | 0.000* | 0.618 | 1 | 0.433  | 5.478 | 1 | 0.020* |
|  |  | NV       | 1.068  | 1 | 0.303  | 2.525 | 1 | 0.114  | 7.691 | 1 | 0.006* |
|  |  | AdjV     | 2.881  | 1 | 0.091  | 0.166 | 1 | 0.684  | 1.337 | 1 | 0.249  |
|  |  | AdvV     | 1.716  | 1 | 0.192  | 1.671 | 1 | 0.198  | 0.094 | 1 | 0.760  |
|  |  | ModV     | 3.570  | 1 | 0.060  | 1.331 | 1 | 0.250  | 0.650 | 1 | 0.421  |
